# Supplementary material for: RNA2HLA: HLA-based quality control of RNA-seq datasets
Source: PubMed Central journal article supplement (PMC8425422; doi:10.1093/bib/bbab055), 2021-03-24

## Color Key

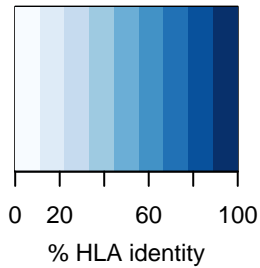

# Canoncito (75 bp)

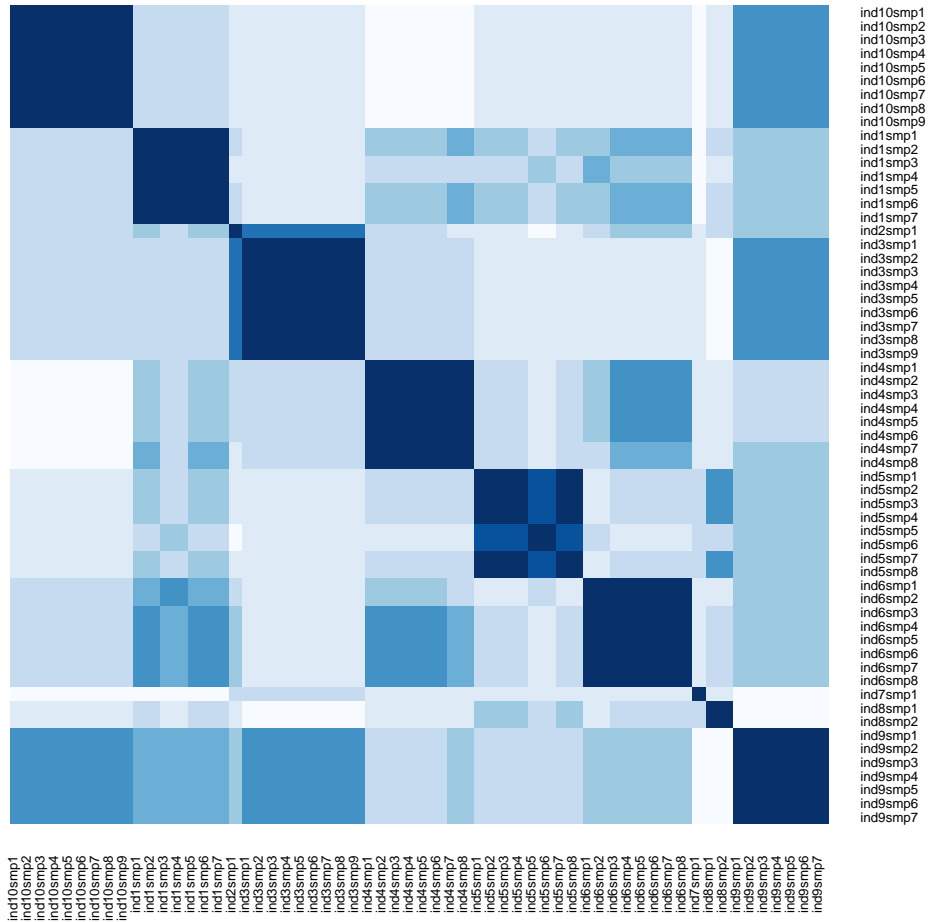

## Color Key

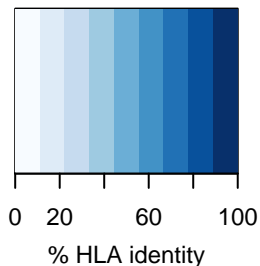

# Canoncito (100 bp)

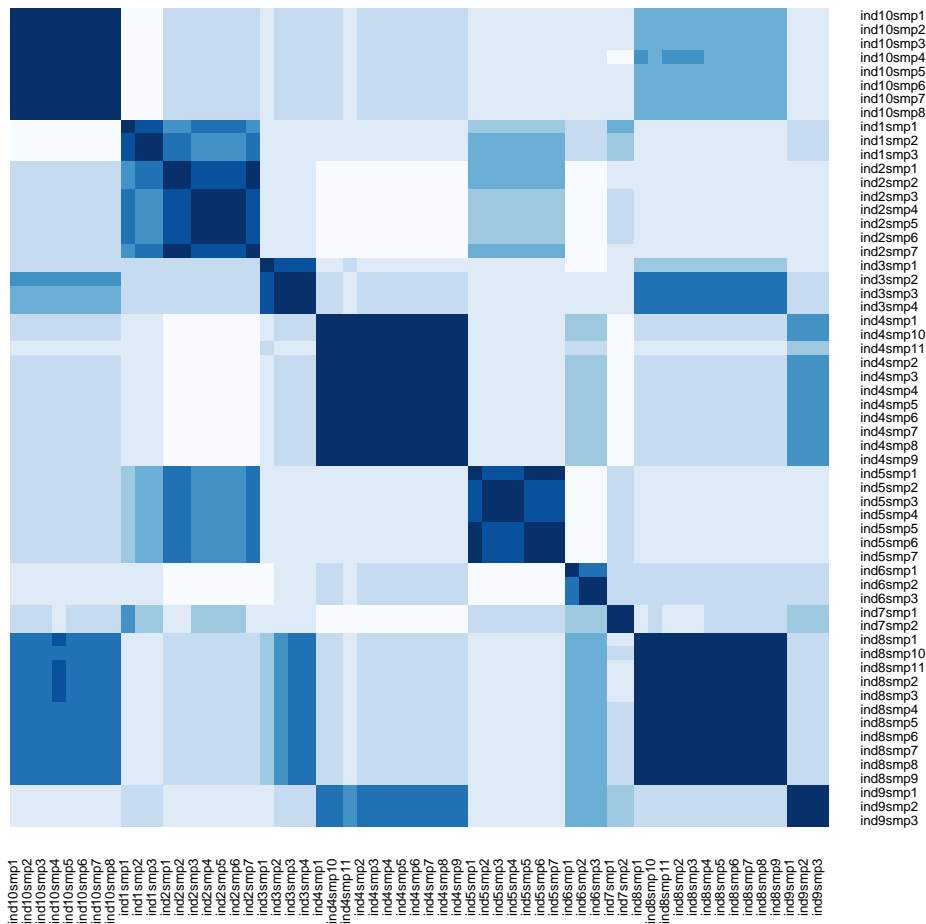

## Color Key



# Cape\_York (75 bp)

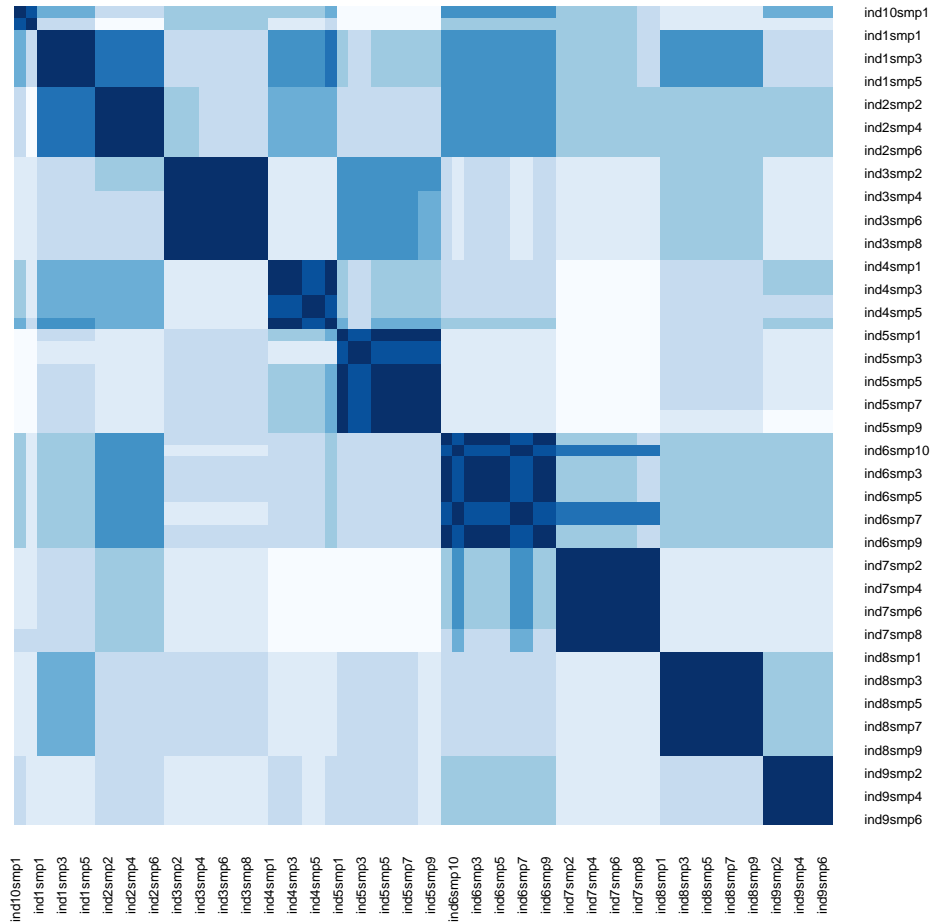

## Color Key

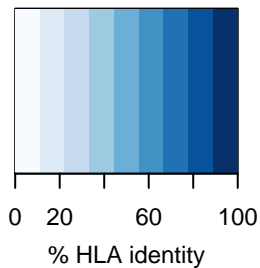

# Cape\_York (100 bp)

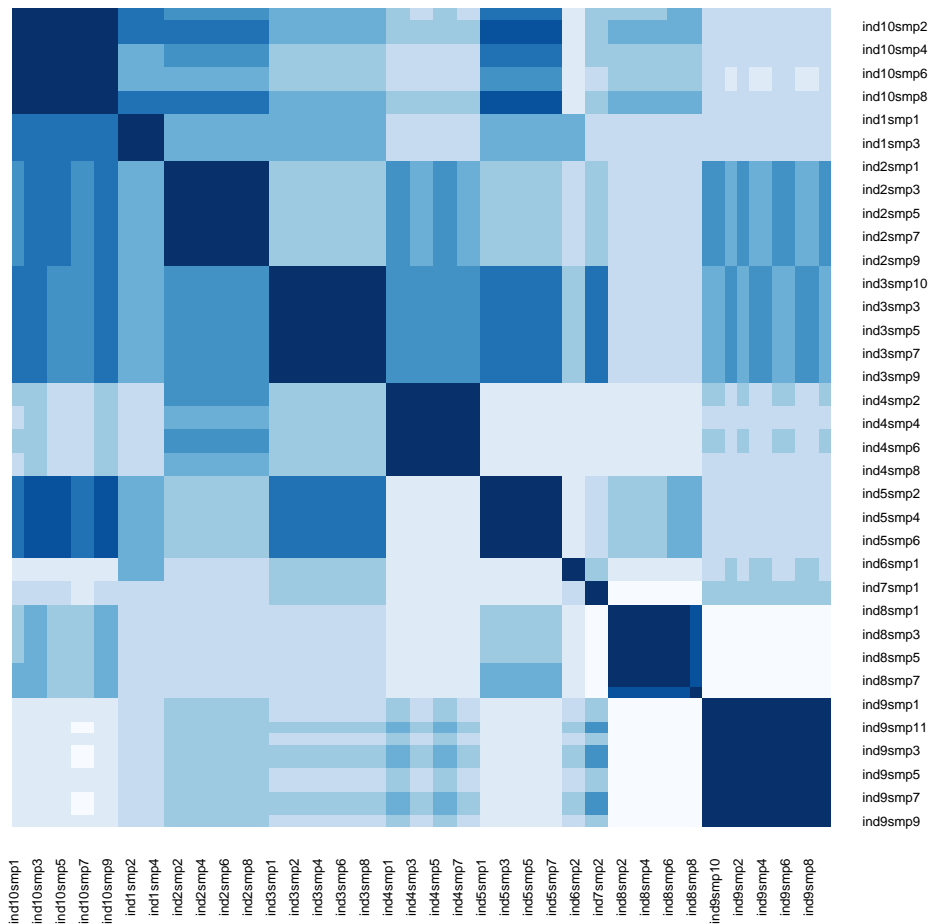

## Color Key



# Czech (75 bp)

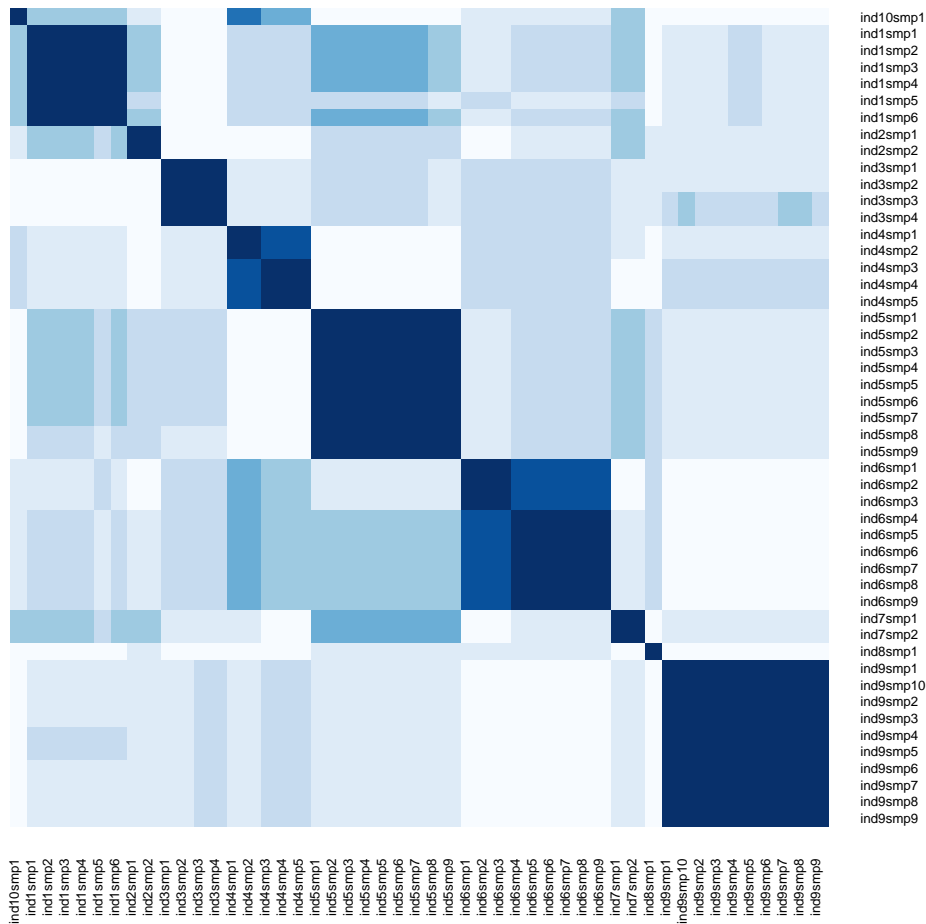

## Color Key

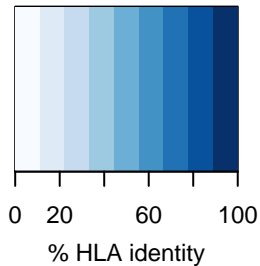

# Czech (100 bp)

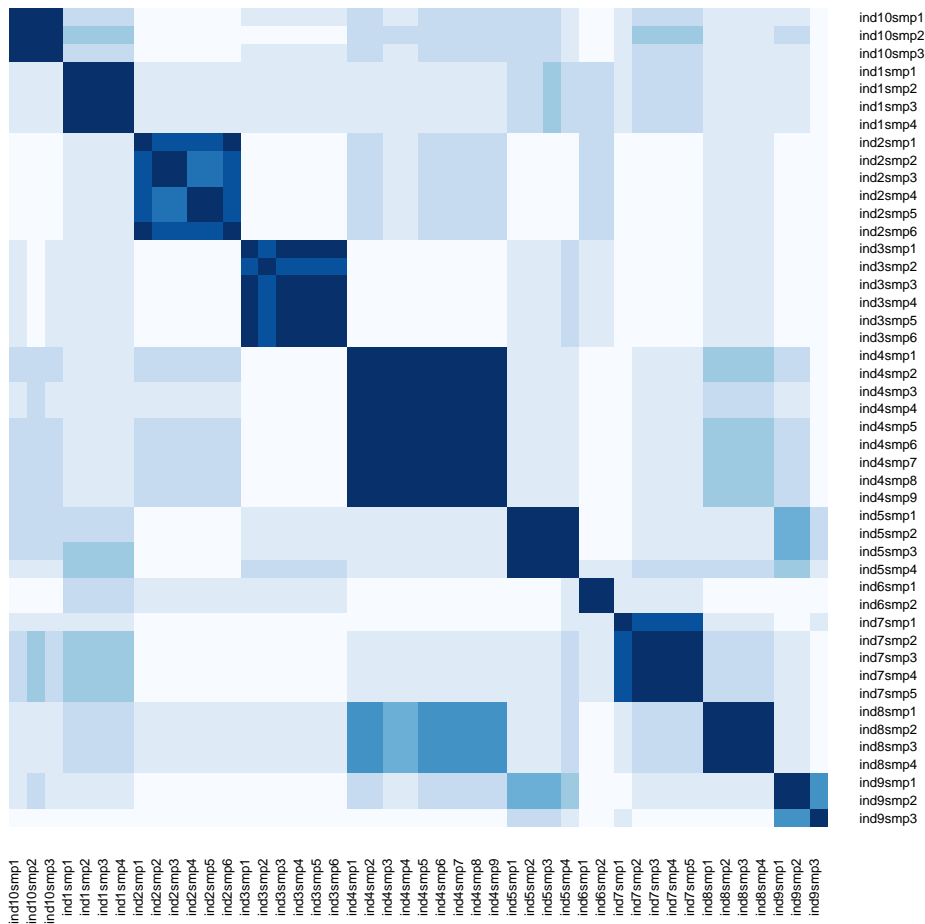

## Color Key

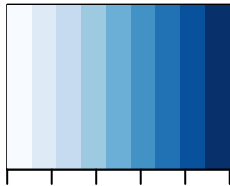

0 20 60 100

% HLA identity

# Finn\_90 (75 bp)

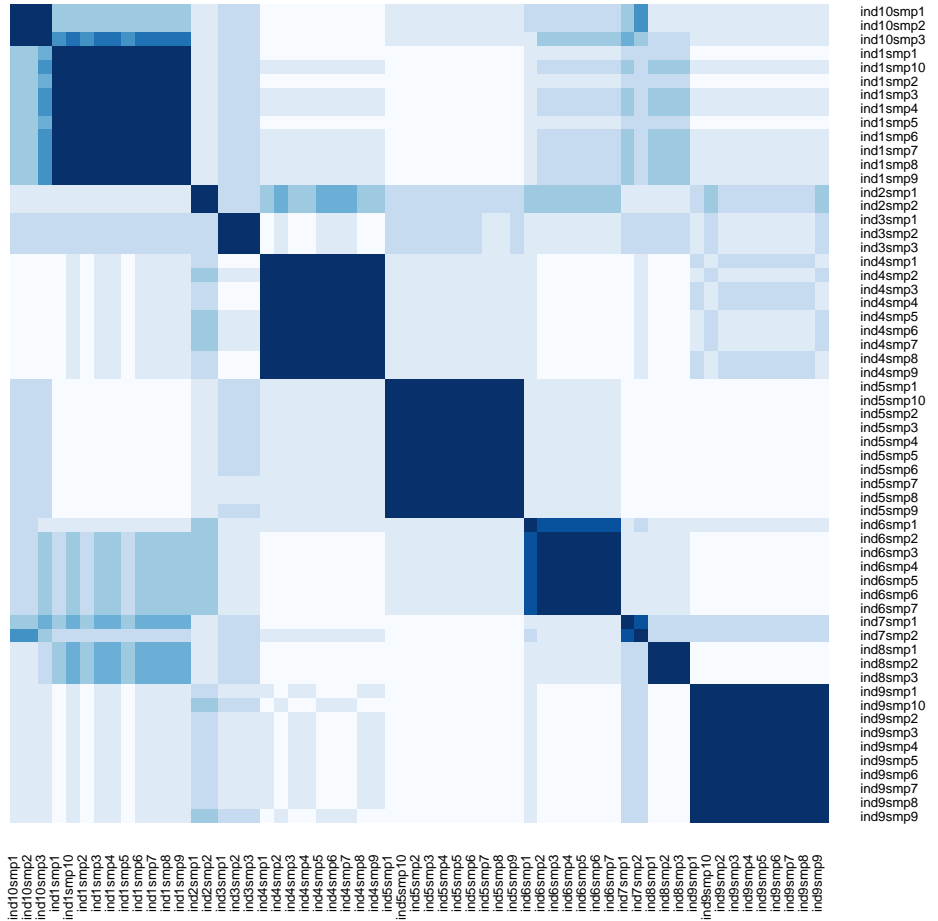

## Color Key

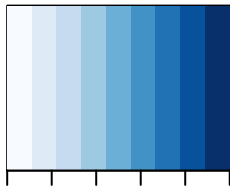

0 20 60 100

% HLA identity

# Finn\_90 (100 bp)

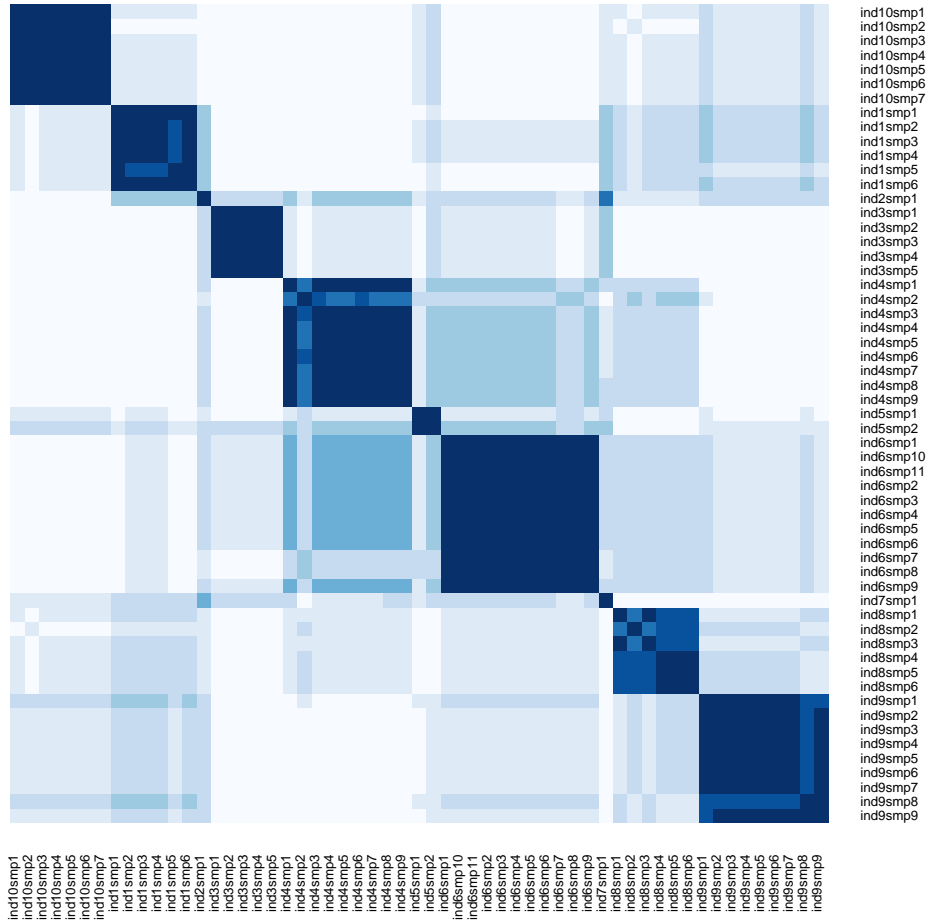



## Color Key



# Japanese (75 bp)

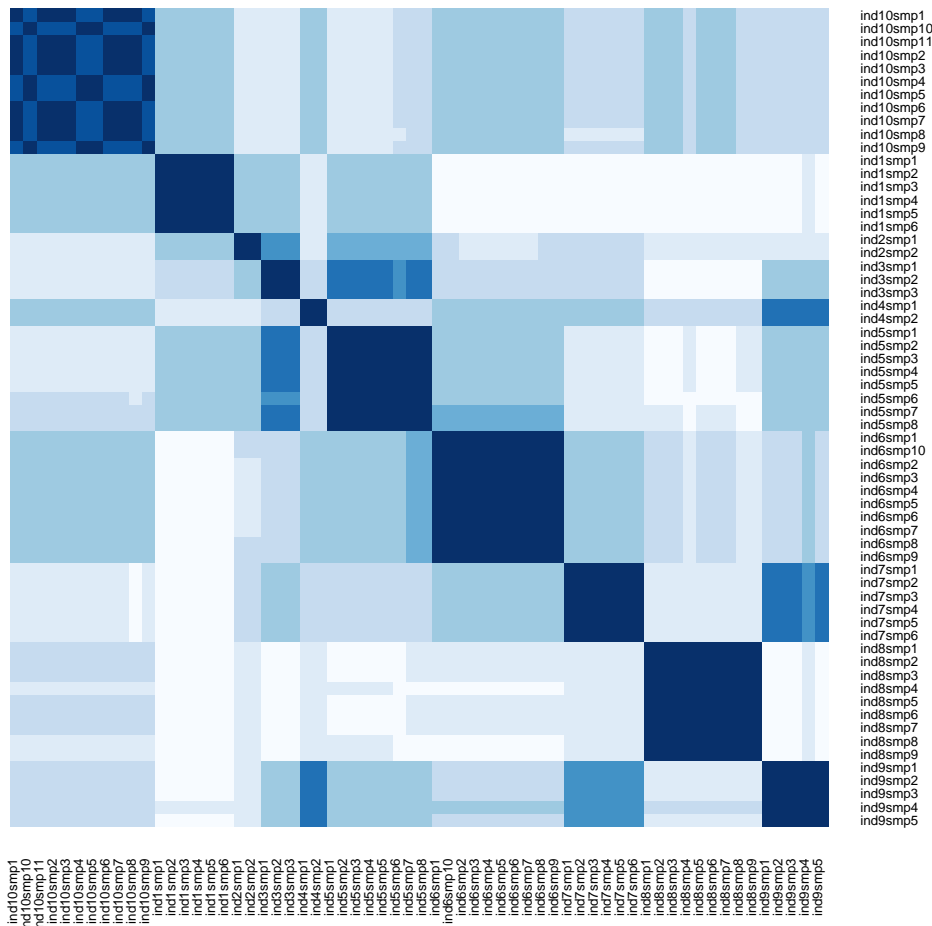

## Color Key

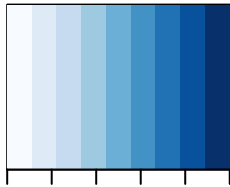

0 20 60 100

% HLA identity

# Japanese (100 bp)

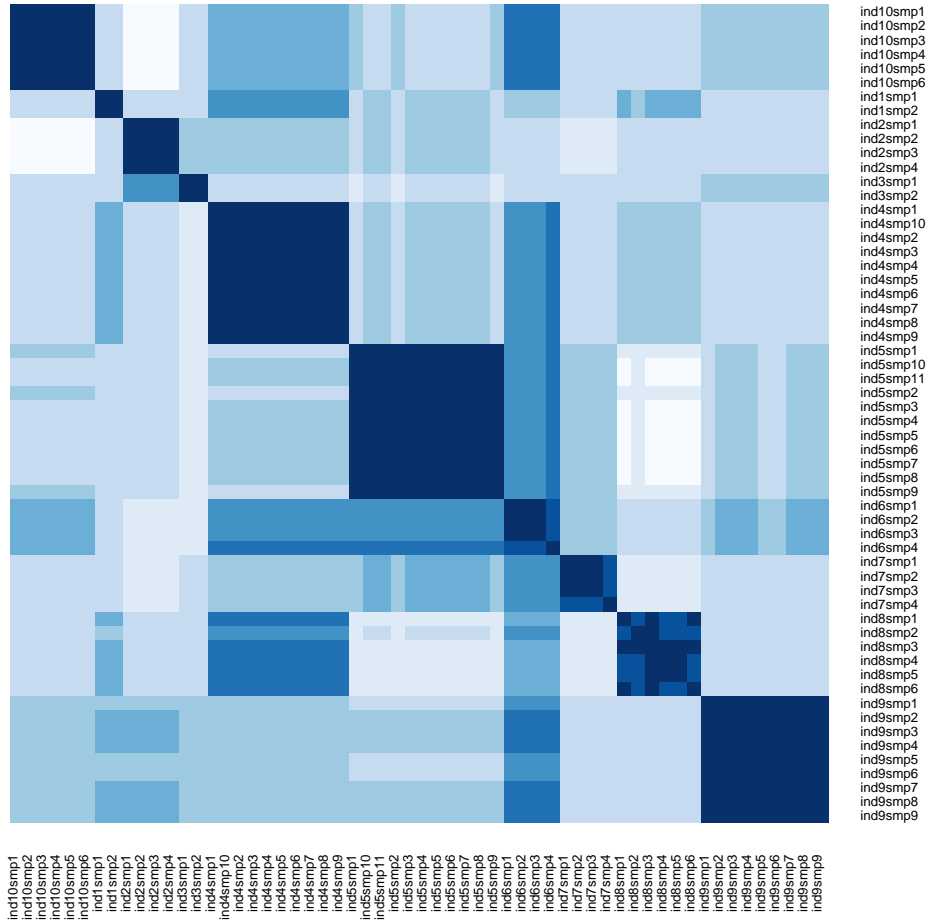

## Color Key



# Kimberley (75 bp)

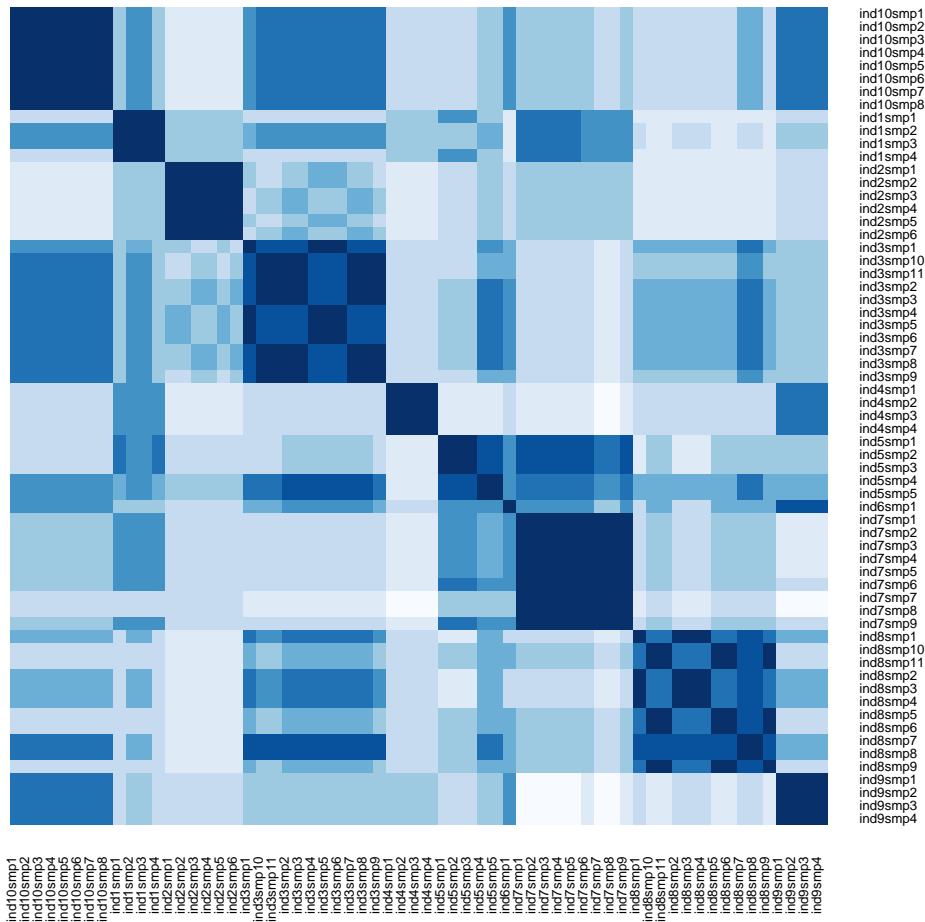

## Color Key



0 20 60 100

% HLA identity

# Kimberley (100 bp)

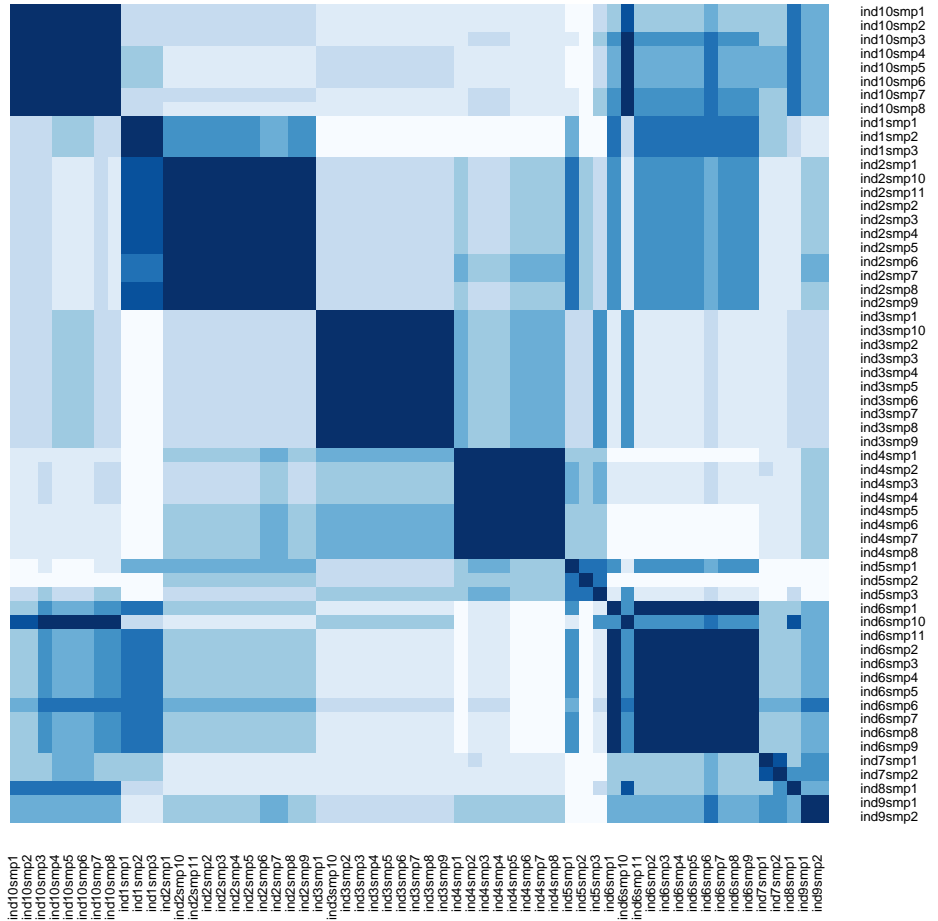

## Color Key



# Mixe (75 bp)

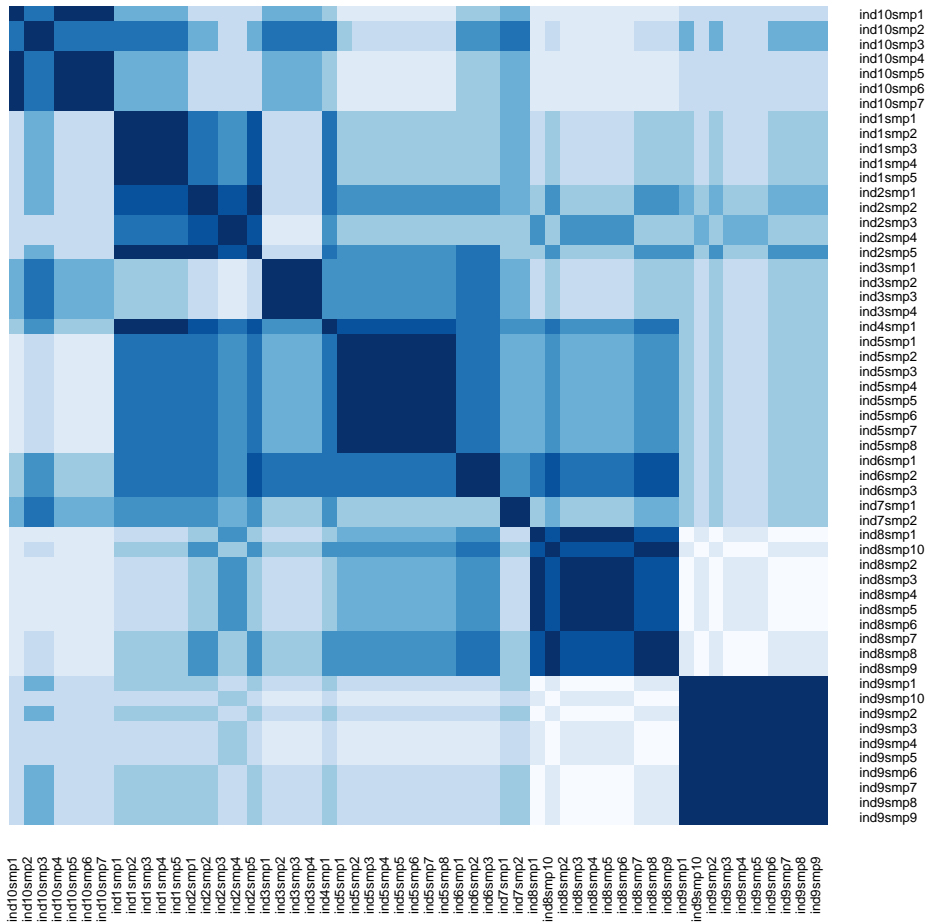

## Color Key



# Mixe (100 bp)

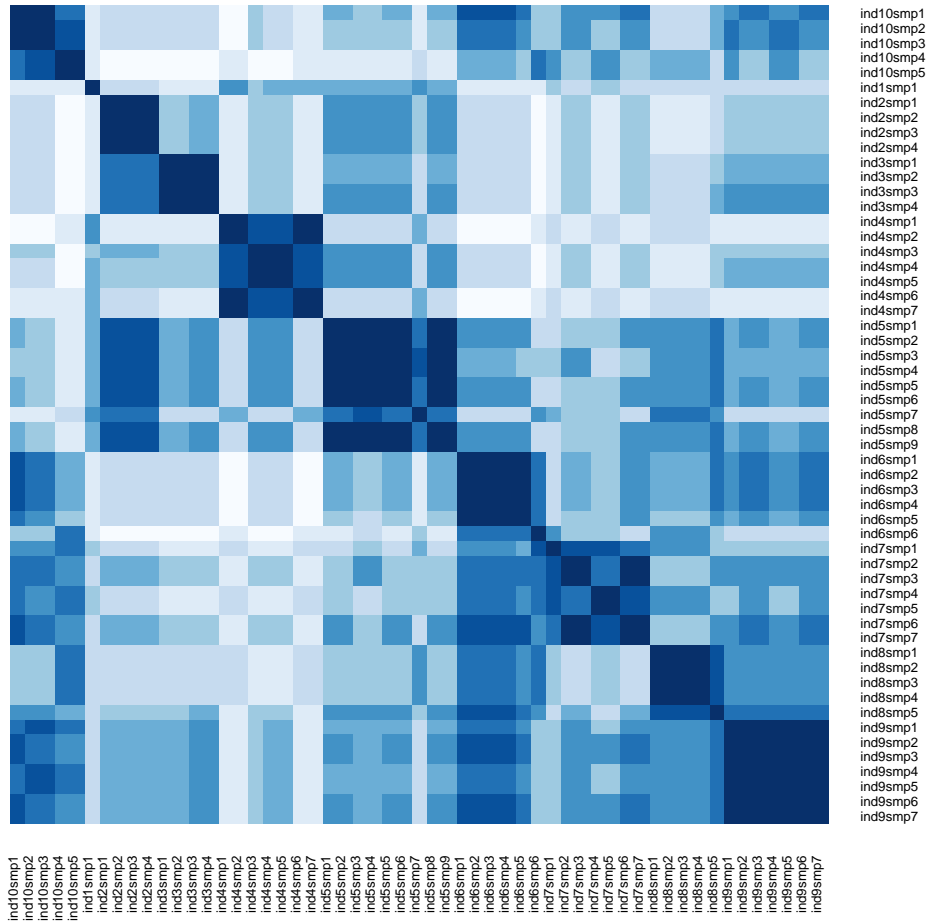

## Color Key

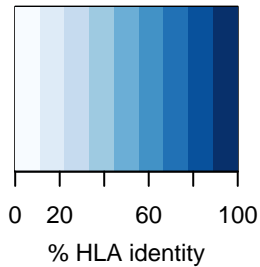

# Mixteco (75 bp)

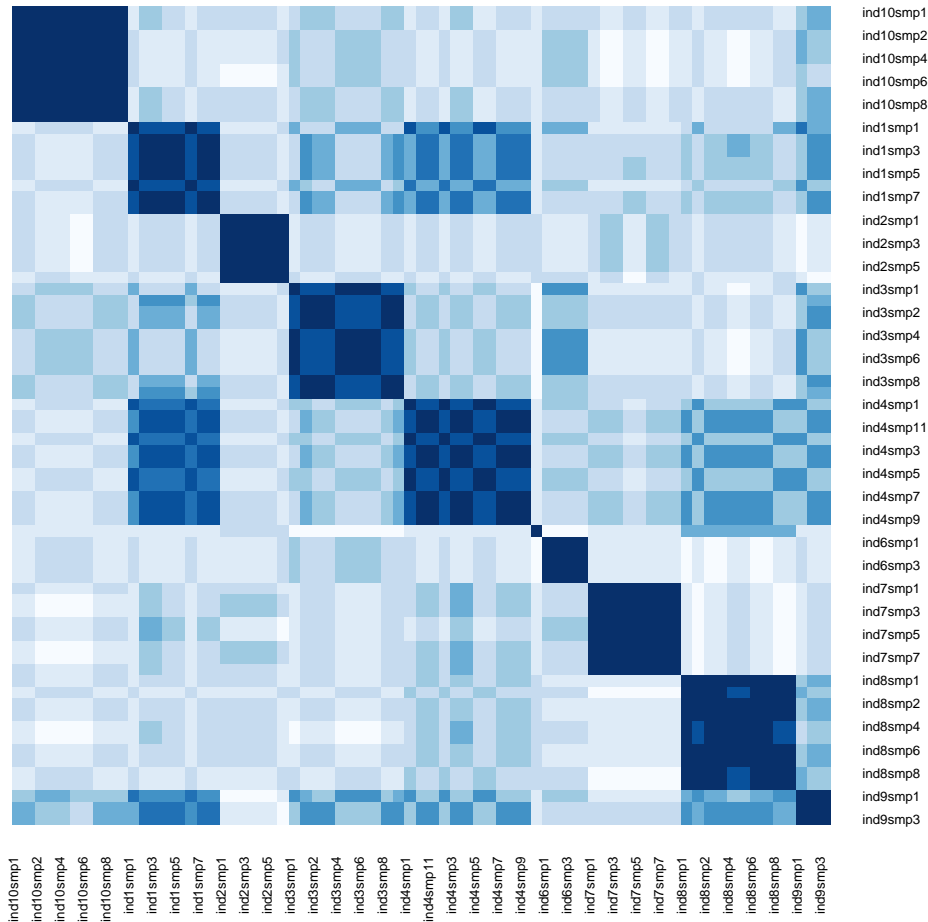

## Color Key



# Mixteco (100 bp)

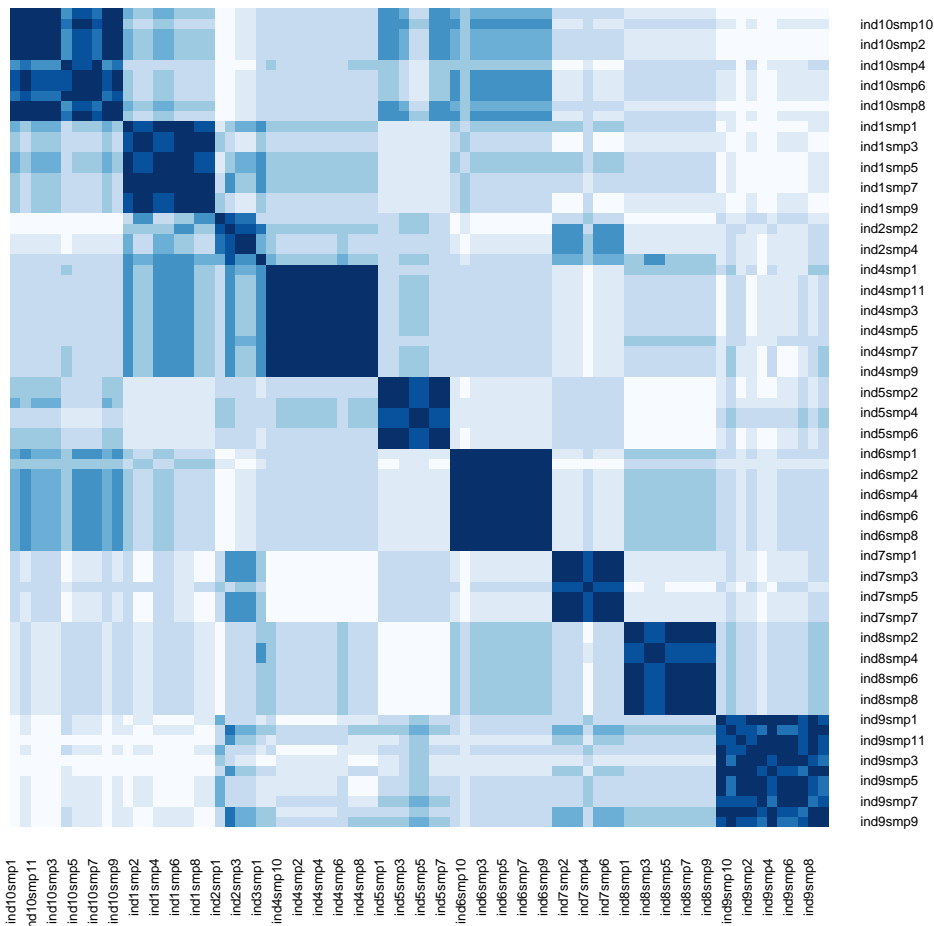



# Color Key

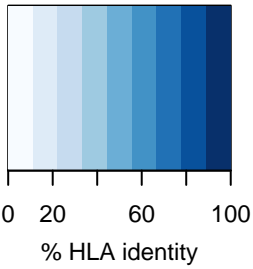

# Nu\_2007 (75 bp)

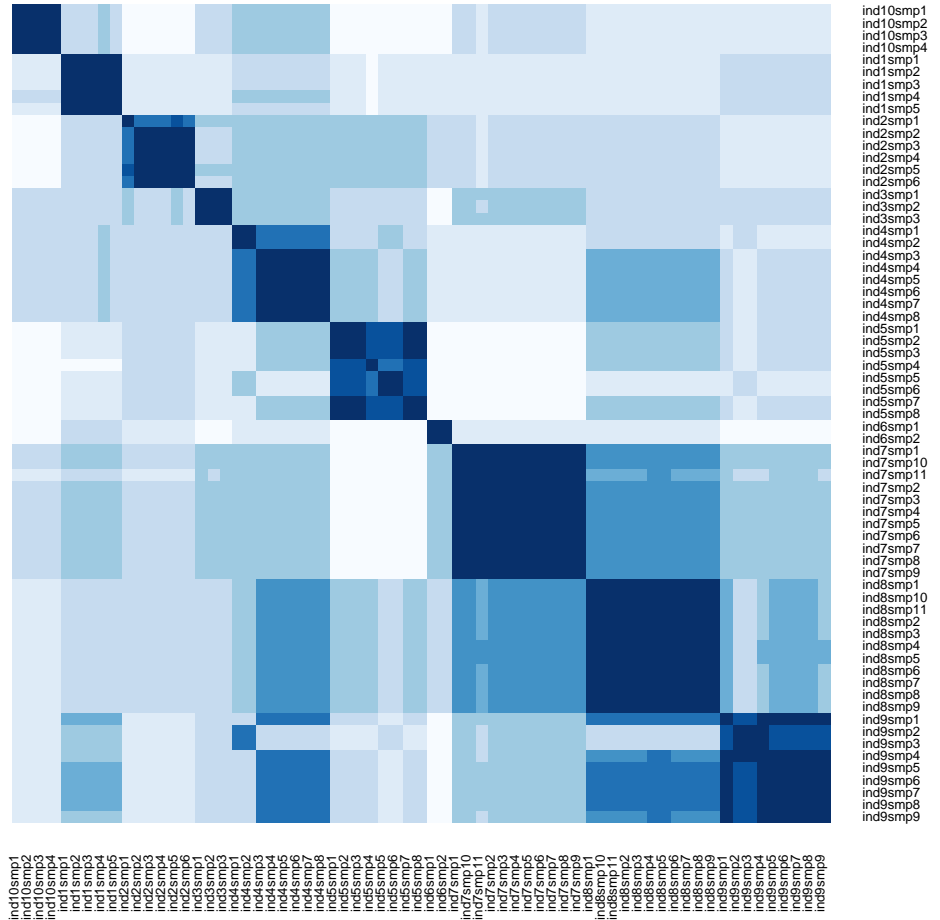

### Color Key



# Nu\_2007 (100 bp)

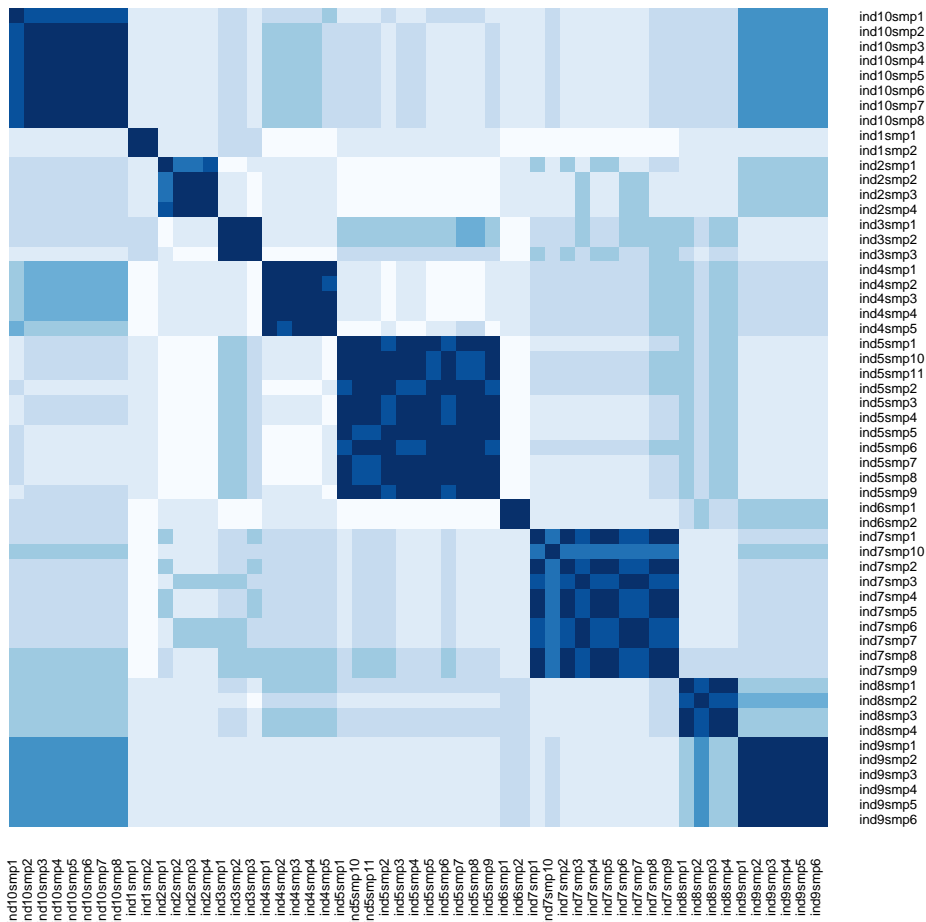

## Color Key



# Shona (75 bp)

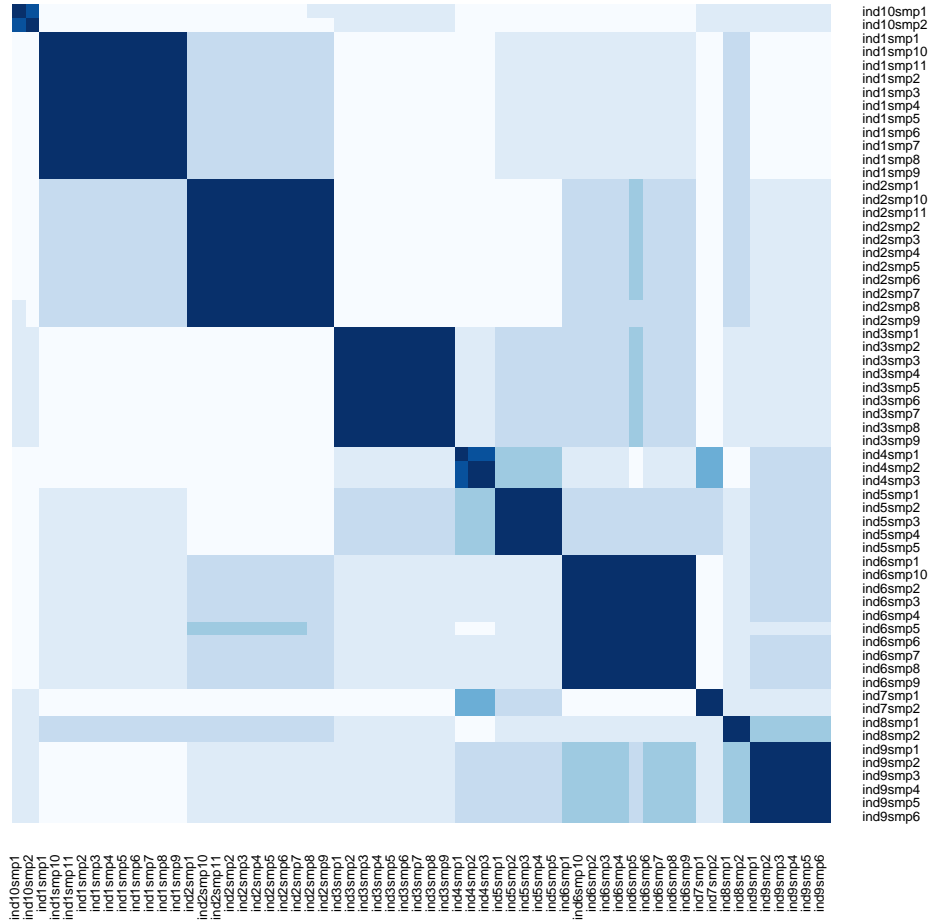

## Color Key



# Shona (100 bp)

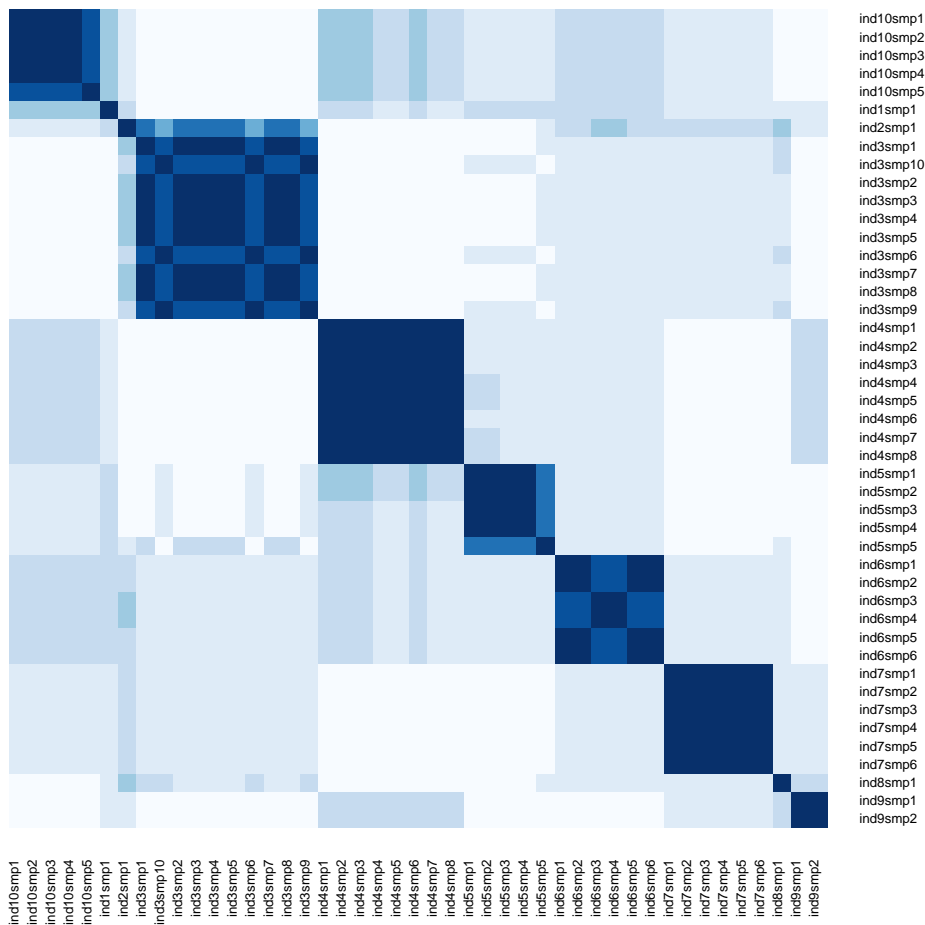

Supplement: suppl_figure_2_bbab055.pdf [file suppl_figure_2_bbab055.pdf]
